# Supplementary material
Source: publisher site journal article supplement (https://www.spandidos-publications.com/5836/downloadSupplementary)

Figure S1. Expression level and prognostic result of EGR1 in patients with LIHC. (A) Box plot showing the expression level of EGR1 in patients with LIHC. \*P<0.05. (B) Line plot showing the prognostic result by dividing patients with LIHC into two groups according to EGR1 expression levels. LIHC, liver hepatocellular carcinoma; HR, hazard ratio.

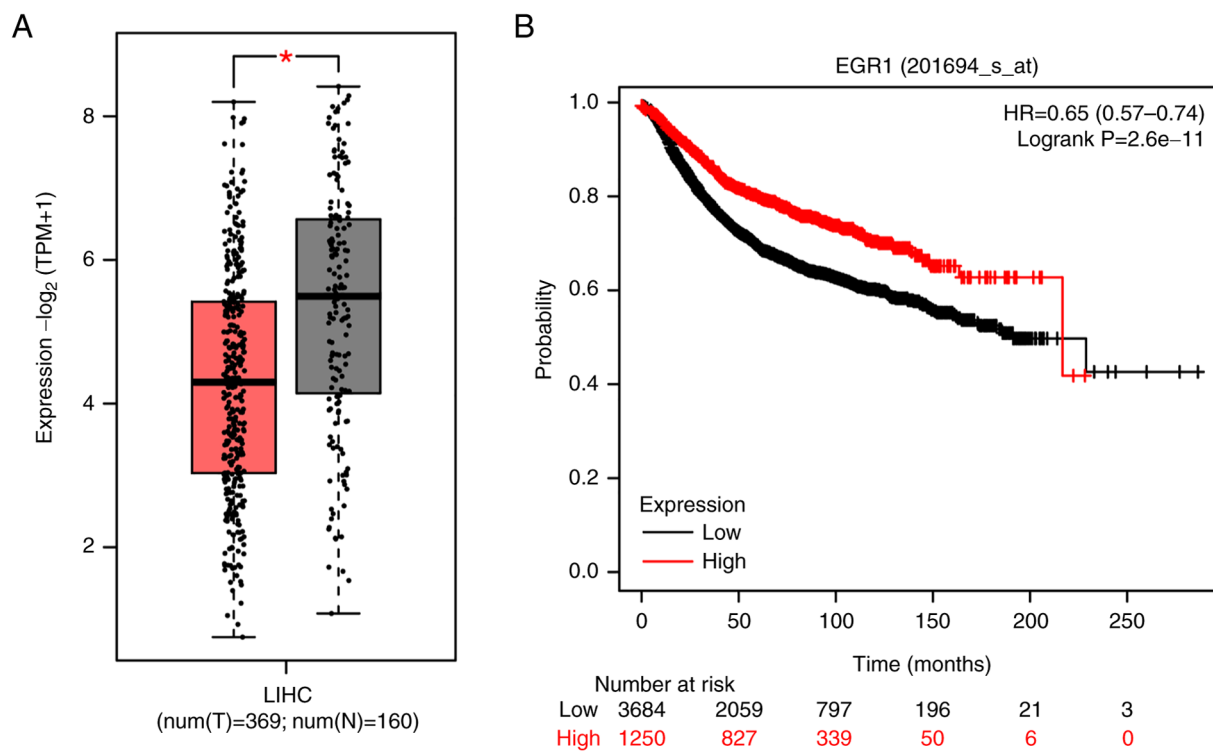

Supplement: Supplementary file 1 [file downloadSupplementary]
